# Supplementary material for: 4-Octyl itaconate reduces influenza A replication by targeting the nuclear export protein CRM1
Source: PubMed Central journal article supplement (PMC10617539; doi:10.1128/jvi.01325-23), 2023-10-12

Figure S2

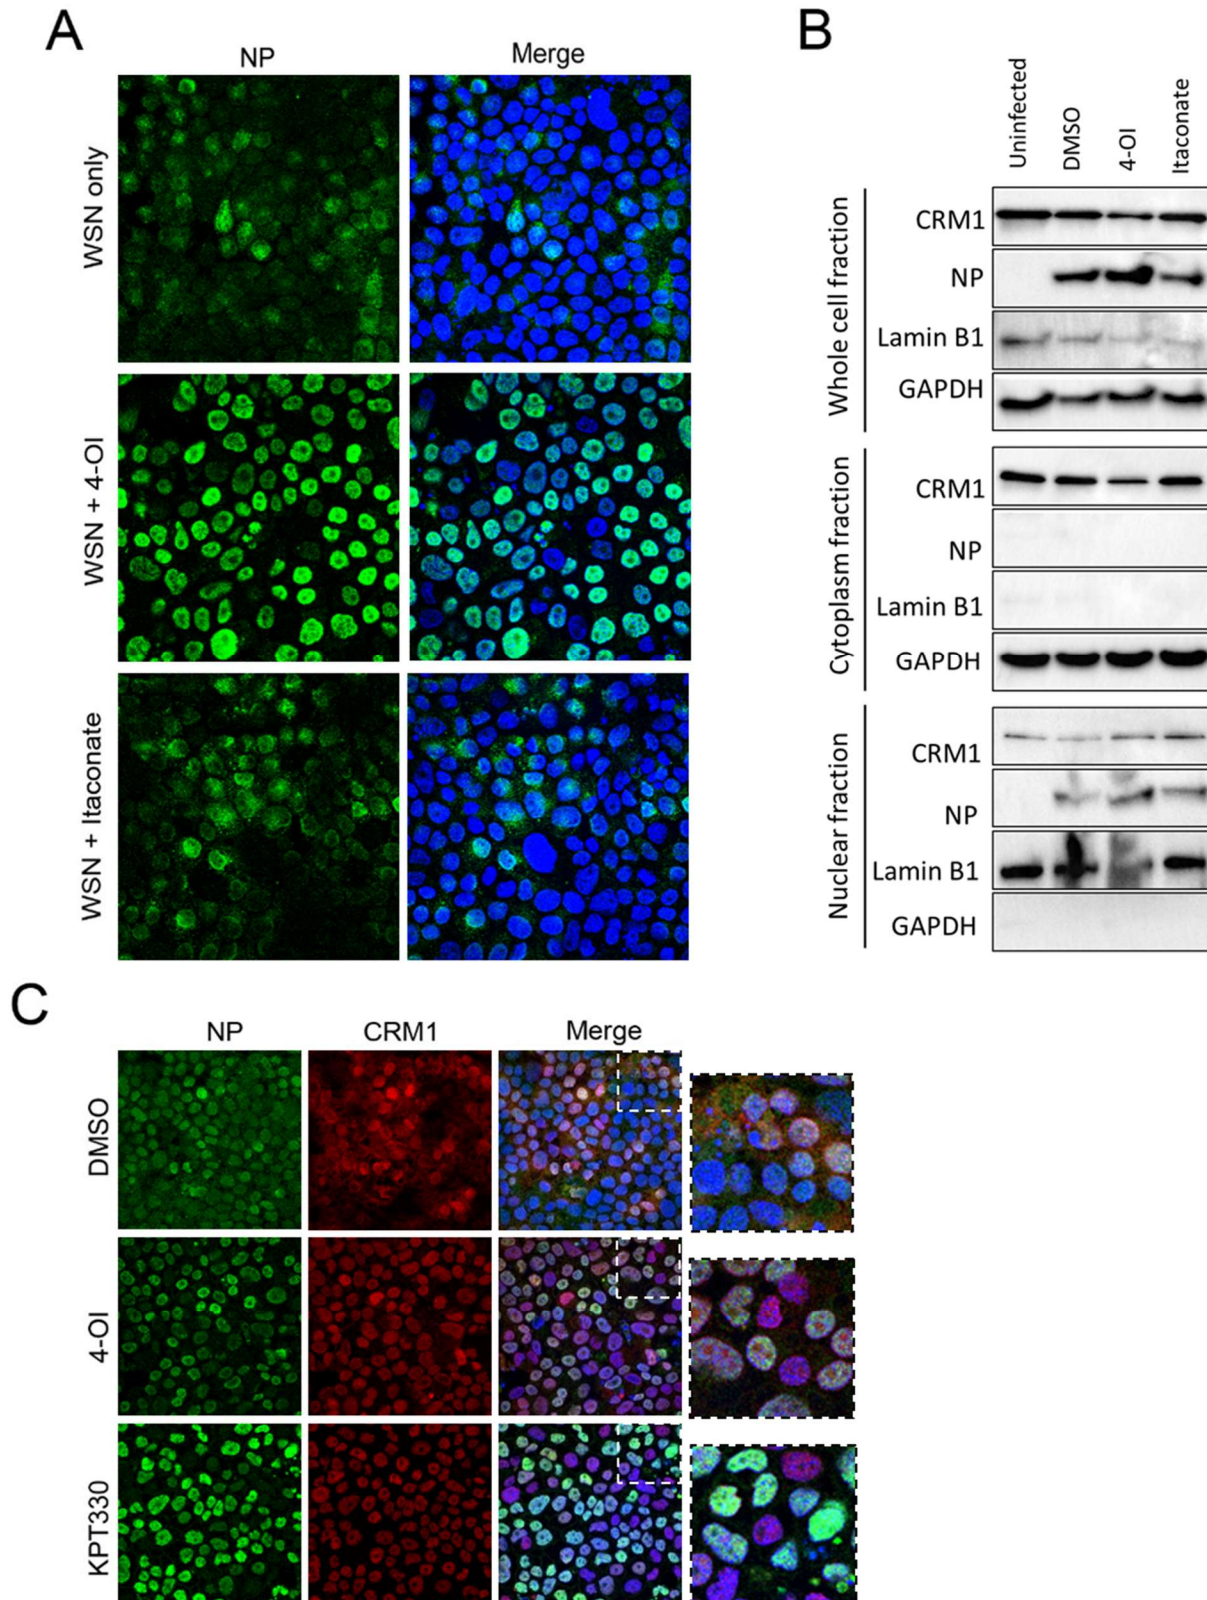

Supplement: jvi.01325-23-s0003.pdf [file jvi.01325-23-s0003.pdf]
